# Supplementary material for: The design and synthesis of new advanced energetic materials based on pyrazole–triazole backbones
Source: Royal Society of Chemistry journal article supplement (doi:10.1039/d3dt00001j), 2023-01-01
Supplement: d3dt00001j1.pdf [file d3dt00001j1.pdf]

## Supporting Information

# **Nitropyrazole-triazole backbone: a promising energetic skeleton to advanced energetic materials**

Jie Tang,<sup>1</sup> Hualin Xiong,<sup>1</sup> Guojie Zhang,<sup>1</sup> Yongxing Tang,<sup>1</sup> Hongwei Yang,<sup>1\*</sup>  
Guangbin Cheng<sup>1\*</sup>

1. School of Chemistry and Chemical Engineering, Nanjing University of Science and Technology, Xiaolingwei 200, Nanjing 210094, P. R. China. E-mail:  
gcheng@mail.njust.edu.cn; hyang@mail.njust.edu.cn

\* Corresponding authors.

## Table of Contents

|                                                                         |    |
|-------------------------------------------------------------------------|----|
| 1. Computational details.....                                           | 3  |
| 2. Experimental Methods .....                                           | 5  |
| 3. Database of N-hetero-bicyclic compounds.....                         | 6  |
| 4. Crystallographic datas .....                                         | 17 |
| 5. <sup>1</sup> H NMR and <sup>13</sup> C NMR of target compounds ..... | 19 |
| 6. The DSC plots of synthesized compounds .....                         | 25 |
| 7. 5s Bursting temperature experiments .....                            | 25 |
| 8. Reference .....                                                      | 25 |

## 1. Computational details

Computations were performed by using the Gaussian09 suite of programs.<sup>1</sup> The elementary geometric optimization and the frequency analysis were performed at the level of the Becke three parameter, Lee-Yan-Parr (B3LYP)<sup>2</sup> functional with the 6-311+G\*\* basis set.<sup>3</sup> All of the optimized structures were characterized to be local energy minima on the potential surface without any imaginary frequencies. Atomization energies were calculated by the CBS-4M.<sup>4</sup> All the optimized structures were characterized to be true local energy minima on the potential-energy surface without imaginary frequencies. The lattice energy of the trinitroethyl derivatives were predicted by using the formula suggested by Jenkins et al.

The predictions of heats of formation (HOF) used the hybrid DFTB3LYP methods with the 6-311+G\*\* basis set through designed isodesmic reactions. The isodesmic reaction processes, that is, the number of each kind of formal bond is conserved, were used with the application of the bond separation reaction (BSR) rules. The molecule was broken down into a set of two heavy-atom molecules containing the same component bonds. The isodesmic reactions used to derive the HOF of target compounds are shown in Scheme S1.

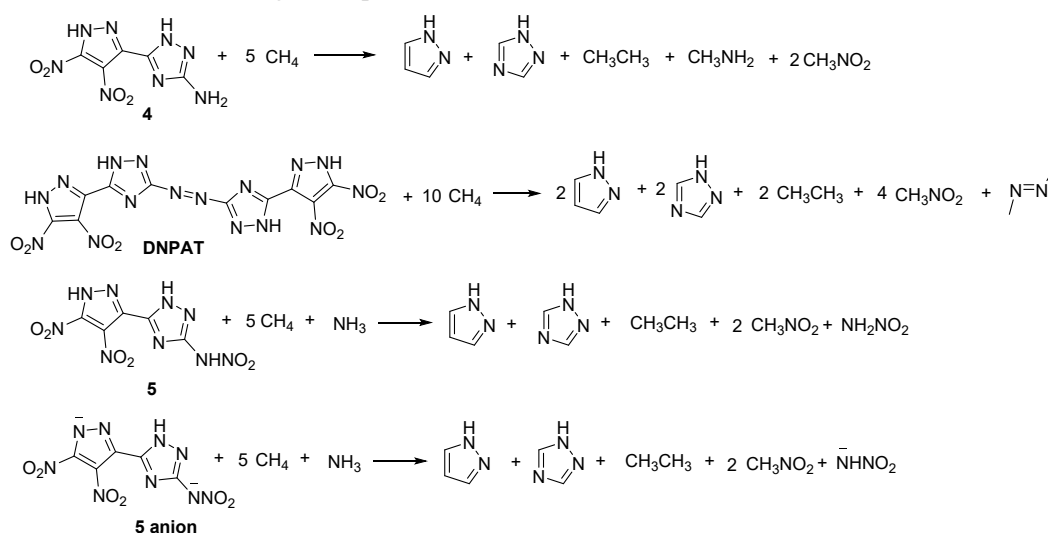

**Scheme S1.** The isodesmic reactions for calculating heat of formation for synthesized compounds.

The change of enthalpy for the reactions at 298K can be expressed by Equation (1):

$$\Delta H_{298} = \Sigma \Delta_f H_P - \Sigma \Delta_f H_R \quad (1)$$

Where  $\Sigma \Delta_f H_P$  and  $\Sigma \Delta_f H_R$  are the HOF of the reactants and products at 298 K, respectively, and  $\Delta H_{298}$  can be calculated from the following expression in Equation (2):

$$\Delta H_{298} = \Delta E_{298} + \Delta(PV) = \Delta E_0 + \Delta ZPE + \Delta H_T + \Delta nRT \quad (2)$$

where  $\Delta E_0$  is the change in total energy between the products and the reactants at 0 K;  $\Delta ZPE$  is the difference between the zero-point energies (ZPE) of the products and the reactants at 0 K;  $\Delta H_T$  is the thermal correction from 0 to 298 K. The  $\Delta(PV)$  value in Equation(2) is the  $PV$  work term. It equals  $\Delta nRT$  for the reactions of an ideal gas. For the isodesmic reactions  $\Delta n = 0$ , so  $\Delta(PV) = 0$ . On the left side of Equation (2), apart from target compound all the others are called reference compounds. The HOF of reference compounds are available either from experiments or from the high level computing such as CBS-4M.

Based on a Born-Haber energy cycle (Scheme S2, the heat of formation of a salt can be simplified by Equation (3):

$$\Delta H_f^\circ(\text{ionic salt}, 298 \text{ K}) = \Delta H_f^\circ(\text{cation}, 298 \text{ K}) + \Delta H_f^\circ(\text{anion}, 298 \text{ K}) - \Delta H_L \quad (3)$$

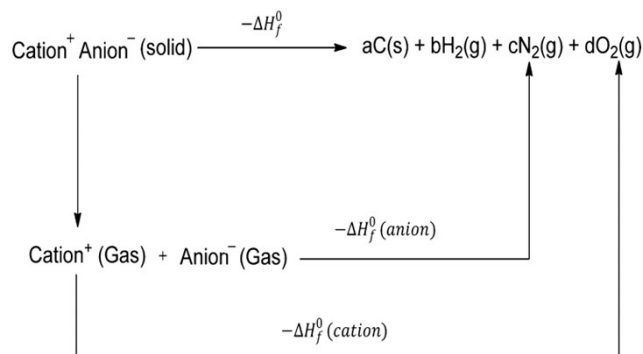

**Scheme S2** Born–Haber cycle for the formation of energetic salts

where  $\Delta H_L$  is the lattice energy of the salt which could be predicted by the formula suggested by Jenkins et al.<sup>4</sup> as given in Equation (4):

$$\Delta HL = UPOT + [p(n_M/2 - 2) + q(n_X/2 - 2)]RT \quad (4)$$

where  $n_M$  and  $n_X$  depend on the nature of the ions  $Mp^+$  and  $Xq^-$ , respectively, and are equal to 3 for monatomic ions, 5 for linear polyatomic ions, and 6 for nonlinear polyatomic ions. The equation for lattice potential energy  $UPOT$  takes the form of equation (5):

$$UPOT (\text{kJ} \cdot \text{mol}^{-1}) = \gamma(\rho_m/M_m)^{1/3 + \delta} \quad (5)$$

where  $\rho_m$  is the density ( $\text{g} \cdot \text{cm}^{-3}$ ),  $M_m$  is the chemical formula mass of the ionic material and the coefficients  $\gamma$  ( $\text{kJ} \cdot \text{mol}^{-1} \text{cm}$ ) and  $\delta$  ( $\text{kJ} \cdot \text{mol}^{-1}$ ) are 8375.6 and -178.8, respectively.

Total energy and heat of formation for the title compounds at B3LYP/6-311+G\*\* level are provide as follows:

| Compound                                                                            | $E_0^a/\text{a.u.}$ | ZPE <sup>b</sup> /kJ mol <sup>-1</sup> | $H_T^c/\text{kJ mol}^{-1}$ | HOF <sup>d</sup> /kJ mol <sup>-1</sup> |
|-------------------------------------------------------------------------------------|---------------------|----------------------------------------|----------------------------|----------------------------------------|
| CH <sub>4</sub>                                                                     | -40.5339263         | 112.26                                 | 10.04                      | -74.6 <sup>e</sup>                     |
| NH <sub>3</sub>                                                                     | -56.5826356         | 86.27                                  | 10.05                      | -45.9 <sup>e</sup>                     |
| CH <sub>3</sub> CH <sub>3</sub>                                                     | -79.8565413         | 187.31                                 | 11.79                      | -84 <sup>e</sup>                       |
| CH <sub>3</sub> NH <sub>2</sub>                                                     | -95.8938402         | 160.78                                 | 11.64                      | -22.5 <sup>e</sup>                     |
| NH <sub>2</sub> NO <sub>2</sub>                                                     | -261.124816         | 98.79                                  | 12.39                      | -3.9 <sup>e</sup>                      |
| CH <sub>3</sub> NO <sub>2</sub>                                                     | -245.091555         | 124.93                                 | 11.6                       | -80.8 <sup>e</sup>                     |
| CH <sub>3</sub> NNCH <sub>3</sub>                                                   | -189.333735         | 211.85                                 | 16.32                      | 147.85                                 |
| NHNO <sub>2</sub> <sup>-</sup>                                                      | -250.573074         | 65.76                                  | 11.37                      | -120.22 <sup>f</sup>                   |
| NH <sub>2</sub> NH <sub>2</sub>                                                     | -                   | 134.28                                 | 11.16                      | 95.4                                   |
| Pyrazole anion                                                                      | -225.669742         | 141.88                                 | 12.21                      | 163.53                                 |
| Pyrazole                                                                            | -226.260331         | 179.2                                  | 12.57                      | 177.4                                  |
| triazole                                                                            | -242.320387         | 150.39                                 | 12.06                      | 192.7                                  |
|  | -242.669331         | 184.02                                 | 12.27                      | 831.72                                 |

## 2. Experimental Methods

**General:** Although we have not encountered any difficulties in preparing the new energetic material, manipulations must be carried out by using standard safety precautions. Leather coat, ear protection, latex gloves, and face shield are strongly recommended for the experimental operation. All compounds should be handled with extreme care.

**General methods:**  $^1\text{H}$  and  $^{13}\text{C}$  NMR spectra were recorded on 500 MHz (Bruker AVANCE 500) nuclear magnetic resonance spectrometers operating at 500 and 125 MHz, respectively, by using either DMSO- $d_6$  or acetone- $d_6$  as the solvent and locking solvent unless otherwise stated. Chemical shifts in  $^1\text{H}$  and  $^{13}\text{C}$  NMR spectra are reported relative to DMSO. DSC was performed at a heating rate of  $10\text{ }^\circ\text{C min}^{-1}$  in closed Al containers with a nitrogen flow of  $30\text{ mL min}^{-1}$  on an STD-Q600 instrument. Infrared (IR) spectra were recorded on a Perkin-Elmer Spectrum BX FT-IR equipped with an ATR unit at  $25\text{ }^\circ\text{C}$ . Impact sensitivity, friction sensitivity and electrostatic discharge sensitivity of samples are measured by using the standard BAM methods.

**X-ray crystallography:** The data were collected with a Bruker three-circle platform diffractometer equipped with a SMART APEX II CCD detector. A Kryoflex low-temperature device was used to keep the crystals at a constant 100 K during the data collection. The data collection and the initial unit cell refinement were performed by using APEX2 (v2010.3-0). Data reduction was performed by using SAINT (v7.68A) and XPREP (v2008/2). Corrections were applied for Lorentz, polarization, and absorption effects by using SADABS (v2008/1). The structure was solved and refined with the aid of the programs in the SHELXTL-plus (v2008/4) system of programs. The full-matrix least-squares refinement on F2 included atomic coordinates and anisotropic thermal parameters for all non-H atoms. The H atoms were included in a riding model. The structure was solved by direct methods with SHELXS-97 and expanded by using the Fourier technique. The nonhydrogen atoms were refined anisotropically. The hydrogen atoms were located and refined.

### 3. Database of N-hetero-bicyclic compounds

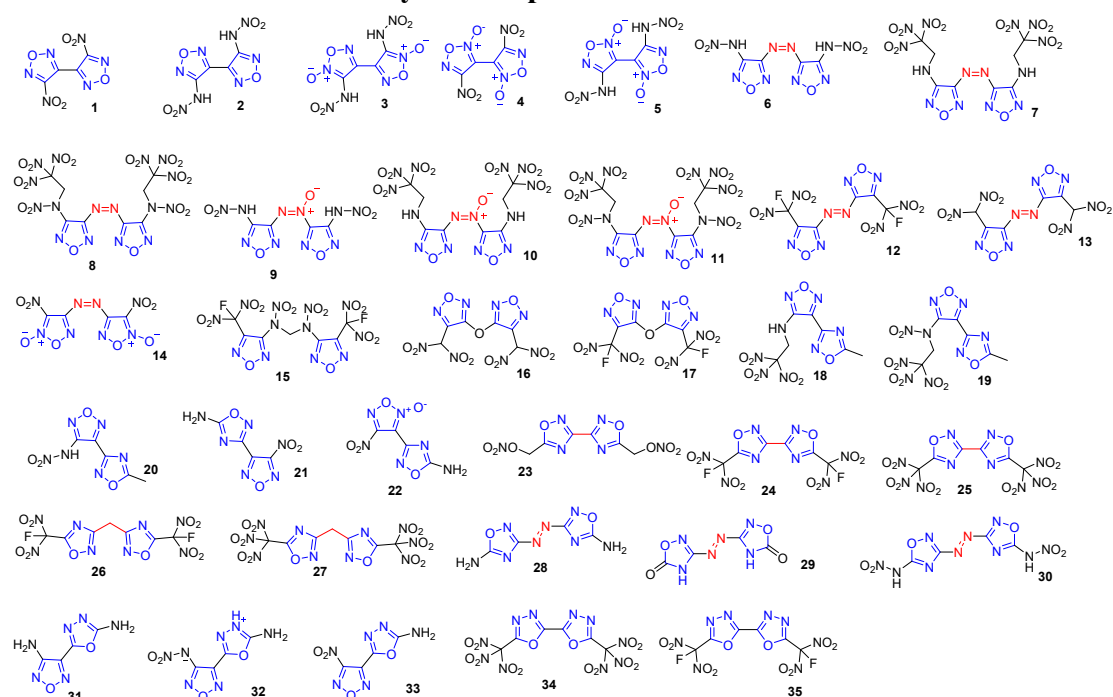

**Table S1.** Energetic properties of bicyclic oxadiazole-based energetic compound

| Compd     | $T_d^a$ [°C] | $\Delta_f H^b$ [kJ mol <sup>-1</sup> ] | $D^c$ [m s <sup>-1</sup> ] | $P^d$ [GPa] | $d^e$ [g cm <sup>-3</sup> ] | $IS^f$ [J] | $FS^g$ [N] |
|-----------|--------------|----------------------------------------|----------------------------|-------------|-----------------------------|------------|------------|
| <b>1</b>  | 85           | 414                                    | 9227                       | 35.7        | 1.85                        | 3.5        | /          |
| <b>2</b>  | 80           | 526                                    | 9477                       | 41.5        | 1.94                        | 1.5        | 48         |
| <b>3</b>  | 74.5         | 462                                    | 9381                       | 40.8        | 1.91                        | 3.0        | 20         |
| <b>4</b>  | 140          | 449                                    | 9525                       | 34.7        | 2.01                        | /          | /          |
| <b>5</b>  | 91.3         | 431                                    | 9472                       | 41.7        | 1.94                        | 2          | 20         |
| <b>6</b>  | 122          | 824                                    | 9255                       | 41.4        | 1.91                        | 3.0        | 20         |
| <b>7</b>  | 230          | 781                                    | 8900                       | 36.3        | 1.82                        | 7.4        | 111        |
| <b>8</b>  | 159          | 1259                                   | 9486                       | 40.8        | 1.87                        | 3.5        | 70         |
| <b>9</b>  | 90           | 772                                    | 9131                       | 44.1        | 1.88                        | 1.0        | 2          |
| <b>10</b> | 190          | 759                                    | 9041                       | 36.7        | 1.84                        | 7.9        | 130        |
| <b>11</b> | 145          | 961                                    | 9458                       | 41.2        | 1.92                        | 1.2        | 80         |
| <b>12</b> | 166          | 176                                    | 8492                       | 30.5        | 1.87                        | 5          | 120        |
| <b>13</b> | 140          | 526                                    | 8936                       | 34.6        | 1.81                        | 2          | 40         |
| <b>14</b> | 119          | 667                                    | 10000                      | /           | 2.00                        | < 1        | /          |
| <b>15</b> | 128          | 299                                    | 8885                       | 37.8        | 1.87                        | 2          | 80         |
| <b>16</b> | 196          | 167                                    | 8715                       | 34.8        | 1.83                        | 2          | /          |
| <b>17</b> | > 270        | /                                      | 8497                       | /           | 1.91                        | 14         | 64         |
| <b>18</b> | 200          | 295                                    | 8118                       | 27.7        | 1.71                        | > 60       | > 360      |
| <b>19</b> | 172          | 413                                    | 8602                       | 32.8        | 1.78                        | /          | /          |

|            |     |      |             |      |      |      |     |
|------------|-----|------|-------------|------|------|------|-----|
| <b>20</b>  | 159 | 356  | 7810        | 24.1 | 1.65 | 37.8 | 360 |
| <b>21</b>  | 89  | 270  | 8155        | 27.3 | 1.74 | 35   | 360 |
| <b>22</b>  | 176 | 412  | 8651        | 33.7 | 1.85 | 20   | 240 |
| <b>23</b>  | 183 | -79  | 8180        | 29.4 | 1.83 | 8.7  | 282 |
| <b>24</b>  | 151 | -362 | 8367        | 30.1 | 1.96 | 10   | 192 |
| <b>25</b>  | 124 | 62   | 8814        | 34.5 | 1.94 | 10   | 80  |
| <b>26</b>  | 166 | -273 | 8580        | 32.6 | 1.88 | /    | /   |
| <b>27</b>  | 117 | 174  | <b>9053</b> | 37.4 | 1.91 | 13   | 72  |
| <b>28</b>  | 355 | 334  | 7980        | 23.4 | 1.73 | > 40 | /   |
| <b>29</b>  | 123 | -81  | 7363        | 20.7 | 1.70 | > 40 | /   |
| <b>30</b>  | 140 | 487  | <b>9190</b> | 37.5 | 1.90 | 2    | 10  |
| <b>31</b>  | 246 | 185  | 7493        | 20.4 | 1.68 | 40   | 360 |
| <b>32</b>  | 132 | 238  | 8227        | 28   | 1.77 | 15   | 120 |
| <b>33</b>  | 155 | 219  | 8102        | 26.9 | 1.75 | 35   | 360 |
| <b>34</b>  | 99  | 231  | 8764        | 33.2 | 1.90 | 10   | 160 |
| <b>35</b>  | /   | -212 | 8440        | 29.7 | 1.90 | /    | /   |
| <b>RDX</b> | 204 | 70.3 | 8795        | 34.9 | 1.80 | 7.4  | 120 |
| <b>HMX</b> | 287 | 74.8 | <b>9144</b> | 39.2 | 1.91 | 7.4  | 120 |

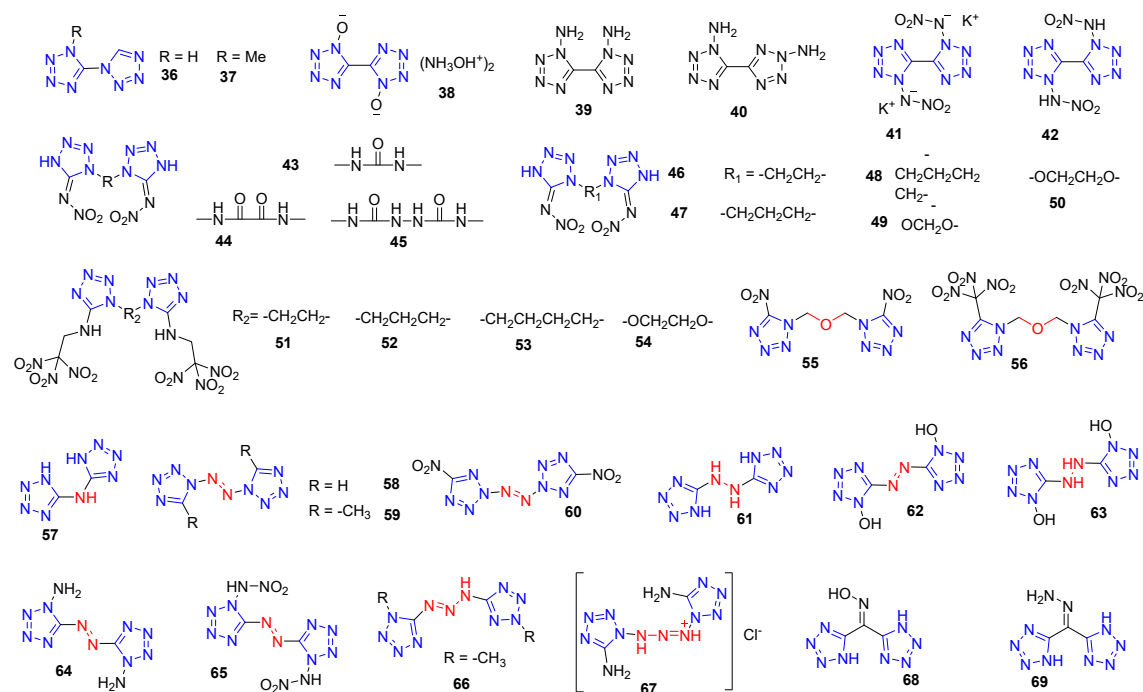

**Table S2.** Energetic properties of tetrazole derivatives

| Compd     | T <sub>dec</sub> [°C] | D [m s <sup>-1</sup> ] | P [GPa] | Δ <sub>f</sub> H [kJ mol <sup>-1</sup> ] | IS [J]                 | d [g cm <sup>-3</sup> ] |
|-----------|-----------------------|------------------------|---------|------------------------------------------|------------------------|-------------------------|
| <b>36</b> | 145                   | 8355                   | 28.2    | 622                                      | < 1                    | 1.73                    |
| <b>37</b> | 135                   | 7593                   | 21.3    | 592                                      | 9                      | 1.57                    |
| <b>38</b> | 221                   | 9698                   | 42.4    | 447                                      | 20                     | 1.88                    |
| <b>39</b> | 185                   | 8898                   | 32.6    | 798                                      | 3                      | 1.76                    |
| <b>40</b> | 175                   | 8934                   | 32.9    | 809                                      | 3                      | 1.76                    |
| <b>41</b> | 200                   | 8330                   | 31.7    | 326                                      | 1                      | 2.11                    |
| <b>42</b> | 107                   | 10142                  | 45.6    | 932                                      | <1                     | 1.93                    |
| <b>43</b> | 223                   | 8255                   | 24.1    | 639                                      | 25                     | 1.65                    |
| <b>44</b> | 232                   | 7767                   | 21.2    | 498                                      | 25                     | 1.65                    |
| <b>45</b> | 215                   | 7886                   | 21.5    | 523                                      | 25                     | 1.63                    |
| <b>46</b> | 194                   | 9329                   | 38.2    | 1038                                     | 10                     | 1.86                    |
| <b>47</b> | 173                   | 8374                   | 28.1    | 1032                                     | 10                     | 1.66                    |
| <b>48</b> | 145                   | 7963                   | 24.7    | 989                                      | 15                     | 1.58                    |
| <b>49</b> | 157                   | 9897                   | 46.7    | 1088                                     | 1                      | 1.90                    |
| <b>50</b> | 134                   | 9200                   | 38.4    | 1103                                     | 1.5                    | 1.81                    |
| <b>51</b> | 183                   | 8460                   | 32.1    | 420                                      | 23                     | 1.79                    |
| <b>52</b> | 143                   | 8256                   | 29.3    | 414                                      | 36                     | 1.73                    |
| <b>53</b> | 166                   | 7996                   | 26.3    | 382                                      | >40                    | 1.66                    |
| <b>54</b> | 147                   | 8734                   | 35.7    | 498                                      | 11                     | 1.84                    |
| <b>55</b> | 203                   | 8892                   | 34.6    | 487                                      | 4                      | 1.85                    |
| <b>56</b> | 130                   | 8909                   | 35.1    | 435                                      | <2                     | 1.83                    |
| <b>57</b> | 250                   | 9120                   | 34.3    | 633                                      | >30                    | 1.86                    |
| <b>58</b> | 80                    | 9185                   | /       | 1030                                     | <1                     | 1.74                    |
| <b>59</b> | 127                   | 7320                   | 21.0    | 986                                      | /                      | 1.48                    |
| <b>60</b> | /                     | 9184                   | 39.0    | 1092                                     | <<<1                   | 1.80                    |
| <b>61</b> | 208                   | 8523                   | 27.7    | 2463                                     | >30                    | 1.84                    |
| <b>62</b> | 170                   | 9548                   | 42.4    | 883                                      | <1                     | 1.90                    |
| <b>63</b> | 120                   | 8711                   | 31.2    | 390                                      | 1                      | 1.71                    |
| <b>64</b> | 179                   | 8723                   | /       | 429                                      | H <sub>50</sub> < 4 cm | 1.66                    |
| <b>65</b> | /                     | 9330                   | 40.0    | 1058                                     | /                      | /                       |
| <b>66</b> | 182                   | 7825                   | 20.9    | 514                                      | 3                      | 1.53                    |
| <b>67</b> | 201                   | 7220                   | /       | 1499                                     | 10                     | 1.56                    |
| <b>68</b> | 288                   | 8226                   |         | 590                                      | >40                    | 1.74                    |
| <b>69</b> | 247                   | 8307                   |         | 646                                      | 25                     | 1.71                    |



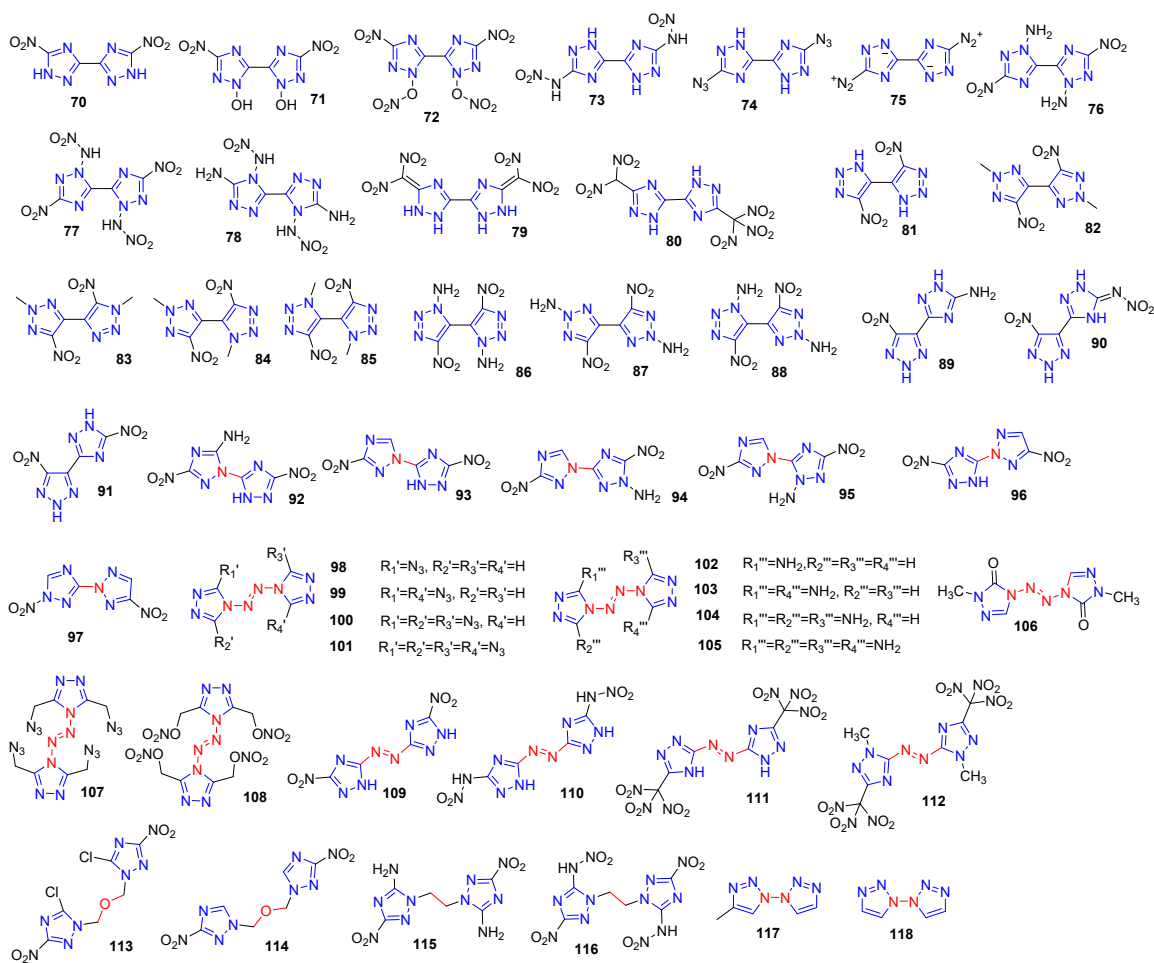

**Table S3.** Energetic properties of bicyclic triazole-based derivatives.

| compd | $T_{\text{dec}}$ [°C] | $D$ [m s <sup>-1</sup> ] | $P$ [GPa] | $\Delta_f H$ [kJ mol <sup>-1</sup> ] | $IS$ [J] | $FS$ [N] | $d$ [g cm <sup>-3</sup> ] |
|-------|-----------------------|--------------------------|-----------|--------------------------------------|----------|----------|---------------------------|
| 70    | 251                   | 8413                     | 32.0      | 285                                  | 10       | 360      | 1.90                      |
| 71    | 191                   | 8729                     | 36.2      | 290                                  | 10       | 360      | 1.91                      |
| 72    | 176                   | 8639                     | 32.7      | 114                                  | 6        | 60       | 1.83                      |
| 73    | 194                   | 8355                     | 30.0      | 405                                  | 3        | 108      | 1.80                      |
| 74    | 201                   | 7944                     | 25.0      | 971                                  | 3        | 48       | 1.70                      |
| 75    | 120                   | 7780                     | 26.7      | 1256                                 | /        | /        | 1.73                      |
| 76    | 271                   | 8677                     | 31.8      | 440                                  | 40       | 360      | 1.83                      |
| 77    | 121                   | 9234                     | 38.2      | 592                                  | 3        | 40       | 1.88                      |
| 78    | 259                   | 8846                     | 31.2      | 692                                  | 9        | 120      | 1.76                      |
| 79    | 121                   | 8499                     | 34.1      | 298                                  | 20       | 360      | 1.80                      |
| 80    | 148                   | 9073                     | 36.2      | 332                                  | 23       | 252      | 1.89                      |
| 81    | 155                   | /                        | /         | 439                                  | /        | /        | /                         |
| 82    | 227                   | 7563                     | 21.3      | 373                                  | >40      | /        | 1.62                      |
| 83    | 275                   | 7642                     | 22.0      | 403                                  | >40      | /        | 1.63                      |
| 84    | 229                   | /                        | /         | 397                                  | /        | /        | /                         |

|     |     |      |      |       |      |          |      |
|-----|-----|------|------|-------|------|----------|------|
| 85  | 237 | 7626 | 21.9 | 391   | >40  | /        | 1.63 |
| 86  | 198 | 8930 | 34.5 | 581   | 9    | /        | 1.85 |
| 87  | 235 | 8884 | 33.9 | 576   | 10   | /        | 1.85 |
| 88  | 191 | 8887 | 34.0 | 579   | 9    | /        | 1.84 |
| 89  | 263 | 8384 | 27.4 | 521   | >40  | >360     | 1.76 |
| 90  | 168 | 9067 | 36.2 | 593   | 16   | 180      | 1.88 |
| 91  | 211 | 8961 | 35.2 | 560   | 24   | 360      | 1.86 |
| 92  | 252 | 7867 | 24.3 | 86.2  | >40  | >360     | 1.68 |
| 93  | 250 | 8364 | 29.0 | 361.8 | 22   | 160      | 1.78 |
| 94  | 167 | 8630 | 31.5 | 476   | 25   | 240      | 1.81 |
| 95  | 242 | 8577 | 30.9 | 465   | 28   | 240      | 1.80 |
| 96  | 250 | 8980 | 28.9 | 190   | 4    | >36 (kp) | 1.89 |
| 97  | 164 | 8980 | 30.8 | 516   | 2    | 8.1 (kp) | 1.82 |
| 98  | 190 | 8280 | 27.0 | 1205  | 12   | /        | 1.63 |
| 99  | 186 | 8540 | 30.0 | 1549  | 8    | /        | 1.66 |
| 100 | 136 | 8950 | 34.0 | 1889  | <3   | /        | 1.74 |
| 101 | 136 | 9370 | 38.0 | 2245  | <3   | /        | 1.76 |
| 102 | 248 | 7640 | 22.0 | 830   | >40  | /        | 1.53 |
| 103 | 245 | 7840 | 23.0 | 799   | >40  | /        | 1.59 |
| 104 | 246 | 7730 | 22.0 | 774   | >40  | /        | 1.57 |
| 105 | 290 | 7700 | 22.0 | 779   | >40  | /        | 1.57 |
| 106 | 258 | 7470 | 19.2 | 344   | >40  | >360     | 1.62 |
| 107 | 136 | 7693 | 20.9 | 1940  | <2   | <5       | 1.53 |
| 108 | 146 | 8194 | 28.5 | 247   | 6    | 80       | 1.70 |
| 109 | /   | 8500 | /    | 407   | 12.5 | 250-360  | 1.88 |
| 110 | 209 | 8784 | 33.7 | 647.7 | 2    | 20       | 1.85 |
| 111 | 150 | 8964 | 36.7 | 555   | 1.5  | /        | 1.83 |
| 112 | 165 | 8742 | 33.8 | 506   | 5.5  | /        | 1.78 |
| 113 | 280 | 7401 | 22.9 | 119   | 28   | 240      | 1.86 |
| 114 | 320 | 7543 | 21.5 | 167   | 20   | 240      | 1.64 |
| 115 | 307 | 8069 | 24.5 | 315   | >40  | 360      | 1.72 |
| 116 | 107 | 8816 | 34.3 | 516   | 10   | 160      | 1.84 |
| 117 | 202 | 6850 | 15.2 | 628   | 18   | 260      | 1.41 |
| 118 | 185 | 7208 | 17.5 | 664   | 17   | 290      | 1.51 |

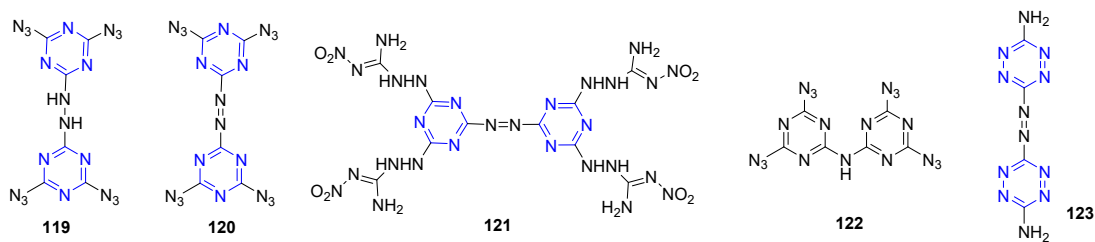

**Table S4.** Energetic properties of triazine and tetrazine derivatives

| compd | $T_{\text{dec}} [^{\circ}\text{C}]$ | $D [\text{m s}^{-1}]$ | $P [\text{GPa}]$ | $\Delta_f H [\text{kJ mol}^{-1}]$ | IS [J]               | FS [N] | $d [\text{g cm}^{-3}]$ |
|-------|-------------------------------------|-----------------------|------------------|-----------------------------------|----------------------|--------|------------------------|
| 119   | 202                                 | /                     | /                | 1753                              | 18.3 cm ( $H_{50}$ ) | 29     | 1.65                   |
| 120   | 200                                 | /                     | /                | 2171                              | 6.2 cm ( $H_{50}$ )  | 24     | 1.72                   |
| 121   | 201                                 | 7812                  | 23.9             | 598                               | >40                  | 360    | 1.71                   |
| 122   | /                                   | 7190                  | 22.2             | 1941                              | /                    | /      | 1.71                   |
| 123   | 252                                 | /                     | /                | 862                               | 70 cm ( $H_{50}$ )   | 360    | 1.84                   |

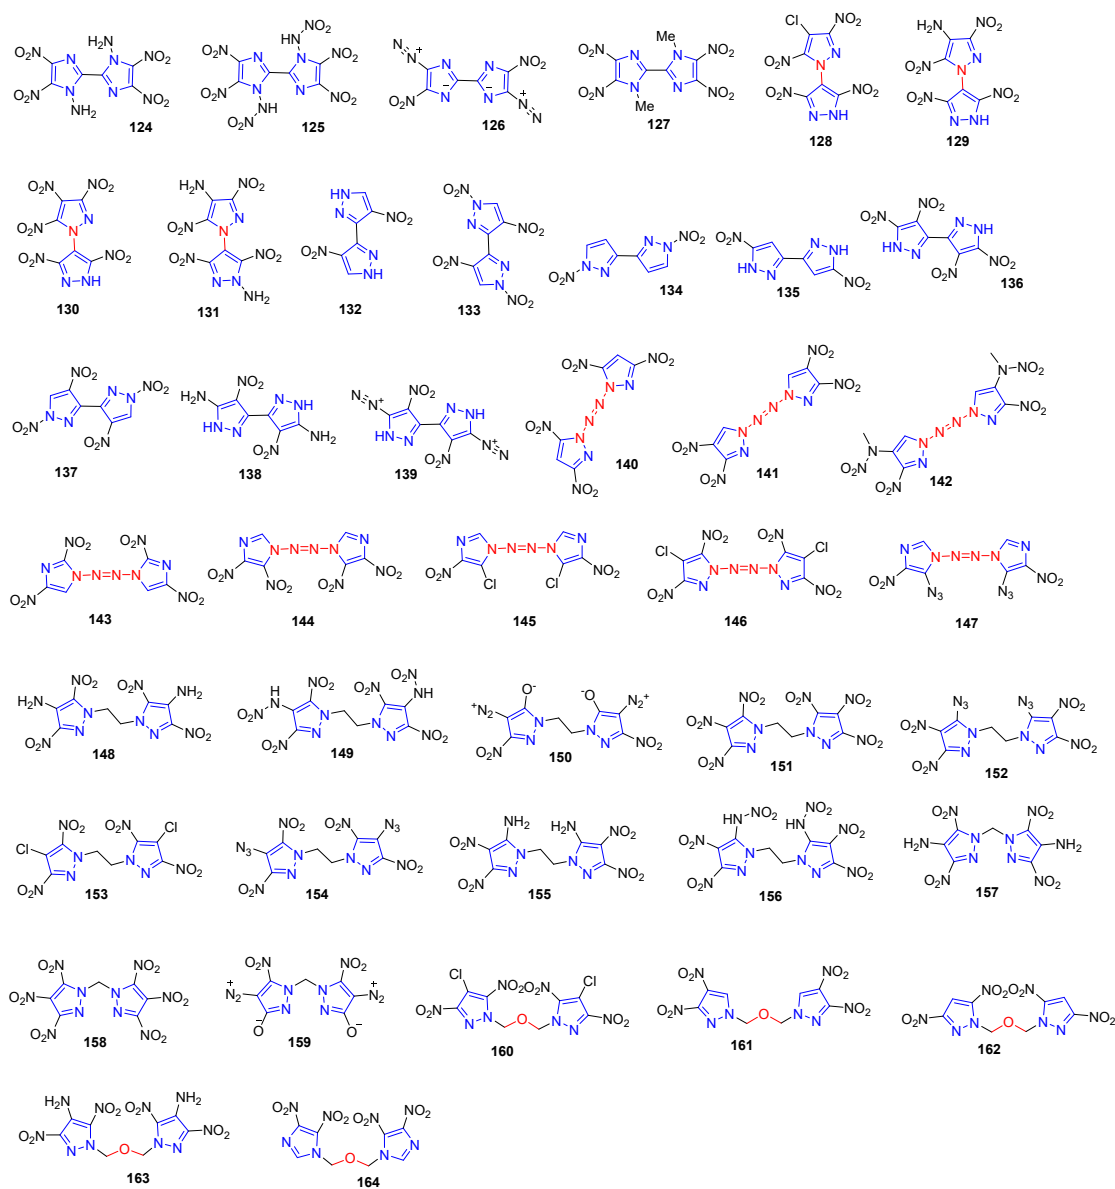

**Table S5.** Energetic properties of bicyclic pyrazole and imidazole derivatives

| Compd      | T <sub>dec</sub> [°C] | D [m s <sup>-1</sup> ]           | P [GPa]                          | Δ <sub>f</sub> H [kJ mol <sup>-1</sup> ] | IS [J]    | FS [N] | d [g cm <sup>-3</sup> ] |
|------------|-----------------------|----------------------------------|----------------------------------|------------------------------------------|-----------|--------|-------------------------|
| <b>124</b> | 217                   | <b>9012</b>                      | 36.6                             | 309                                      | <b>15</b> | 160    | 1.93                    |
| <b>125</b> | 116                   | <b>9350</b>                      | 40.1                             | 476                                      | 3         | 20     | 1.94                    |
| <b>126</b> | 199                   | 8653                             | 31.1                             | 820                                      | 1         | 20-40  | 1.83                    |
| <b>127</b> | 258                   | 7604                             | 24.2                             | 145                                      | >40       | >292   | 1.70                    |
| <b>128</b> | 308                   | 8724                             | 36.0                             | 185                                      | >40       | /      | 1.96                    |
| <b>129</b> | 242                   | 8600, 8789,<br>8626 <sup>a</sup> | 35.0, 35.9,<br>36.0 <sup>a</sup> | 388                                      | >40       | /      | 1.89                    |
| <b>130</b> | 297                   | 8814, 8760,<br>8981 <sup>a</sup> | 37.0, 35.0,<br>36.0 <sup>a</sup> | 824                                      | 28        | /      | 1.82                    |
| <b>131</b> | 284                   | 8648, 8760,<br>8653 <sup>a</sup> | 35.1, 35.4,<br>33.9 <sup>a</sup> | 478                                      | >40       | /      | 1.87                    |
| <b>132</b> | 365                   | 8120                             | 26.9                             | 221                                      | >40       | >360   | 1.83                    |
| <b>133</b> | 206                   | 8869                             | 34.5                             | 407                                      | 2         | 40     | 1.85                    |
| <b>134</b> | 183                   | 8301                             | 28.8                             | 414                                      | 20        | 240    | 1.81                    |
| <b>135</b> | 376                   | 8026                             | 26.2                             | 229                                      | >40       | >360   | 1.81                    |
| <b>136</b> | 243                   | 8556                             | 32.3                             | 42.7                                     | 30        | 360    | 1.84                    |
| <b>137</b> | 152                   | 8926                             | 35.4                             | 444                                      | 2         | 60     | 1.86                    |
| <b>138</b> | 228                   | 7779                             | 23.0                             | 212                                      | >60       | >360   | 1.72                    |
| <b>139</b> | 150                   | 8943                             | 34.0                             | 987                                      | 1         | 20     | 1.85                    |
| <b>140</b> | 240                   | 8928                             | 34.8                             | 687                                      | 5         | 60     | 1.81                    |
| <b>141</b> | 223                   | 8964                             | 35.1                             | 687                                      | 5         | 80     | 1.82                    |
| <b>142</b> | 195                   | 8834                             | 34.6                             | 644                                      | 2         | 40     | 1.80                    |
| <b>143</b> | 258                   | 8979                             | 35.1                             | 592                                      | 15        | 160    | 1.85                    |
| <b>144</b> | 232                   | 8932                             | 35.1                             | 612                                      | 10        | 120    | 1.83                    |
| <b>145</b> | 271                   | 7632                             | 24.9                             | 578                                      | 25        | 360    | 1.86                    |
| <b>146</b> | 251                   | 8255                             | 30.6                             | 666                                      | 4         | 40     | 1.92                    |
| <b>147</b> | 154                   | 8702                             | 31.4                             | 1259                                     | 2         | 40     | 1.77                    |
| <b>148</b> | 311                   | 8189                             | 27.9                             | 219                                      | >40       | >360   | 1.77                    |
| <b>149</b> | 80                    | 8753                             | 34.3                             | 381                                      | 7         | 80     | 1.84                    |
| <b>150</b> | 247                   | 7803                             | 24.2                             | 442                                      | 20        | 80     | 1.72                    |
| <b>151</b> | 250                   | 8759                             | 34.1                             | 307                                      | 25        | 160    | 1.84                    |
| <b>152</b> | 112                   | 8797                             | 33.4                             | 1234                                     | 4         | 60     | 1.78                    |

|            |     |      |      |      |     |      |      |
|------------|-----|------|------|------|-----|------|------|
| <b>153</b> | 319 | 7877 | 27.0 | 230  | >40 | >360 | 1.88 |
| <b>154</b> | 135 | 8558 | 31.0 | 1014 | 3   | 60   | 1.76 |
| <b>155</b> | 256 | 8127 | 27.3 | 238  | >40 | >360 | 1.75 |
| <b>156</b> | 81  | 8710 | 33.7 | 368  | 6   | 60   | 1.83 |
| <b>157</b> | 310 | 8332 | 29.6 | 205  | 11  | >360 | 1.80 |
| <b>158</b> | 205 | 9304 | 39.1 | 379  | 4   | 144  | 1.93 |
| <b>159</b> | 226 | 8016 | 26.0 | 497  | 1.5 | 40   | 1.73 |
| <b>160</b> | 284 | 7813 | 26.2 | 129  | 30  | >360 | 1.84 |
| <b>161</b> | 298 | 7904 | 26.0 | 163  | >40 | >360 | 1.69 |
| <b>162</b> | 299 | 7874 | 25.7 | 141  | 10  | 240  | 1.69 |
| <b>163</b> | 203 | 8068 | 27.1 | 127  | 25  | >360 | 1.74 |
| <b>164</b> | 270 | 8067 | 27.8 | 75   | >40 | >360 | 1.76 |

a. Detonation velocity calculated by the EXPLO5 program, modified nitrogen equivalent method, and Kamlet-Jacobs equations.

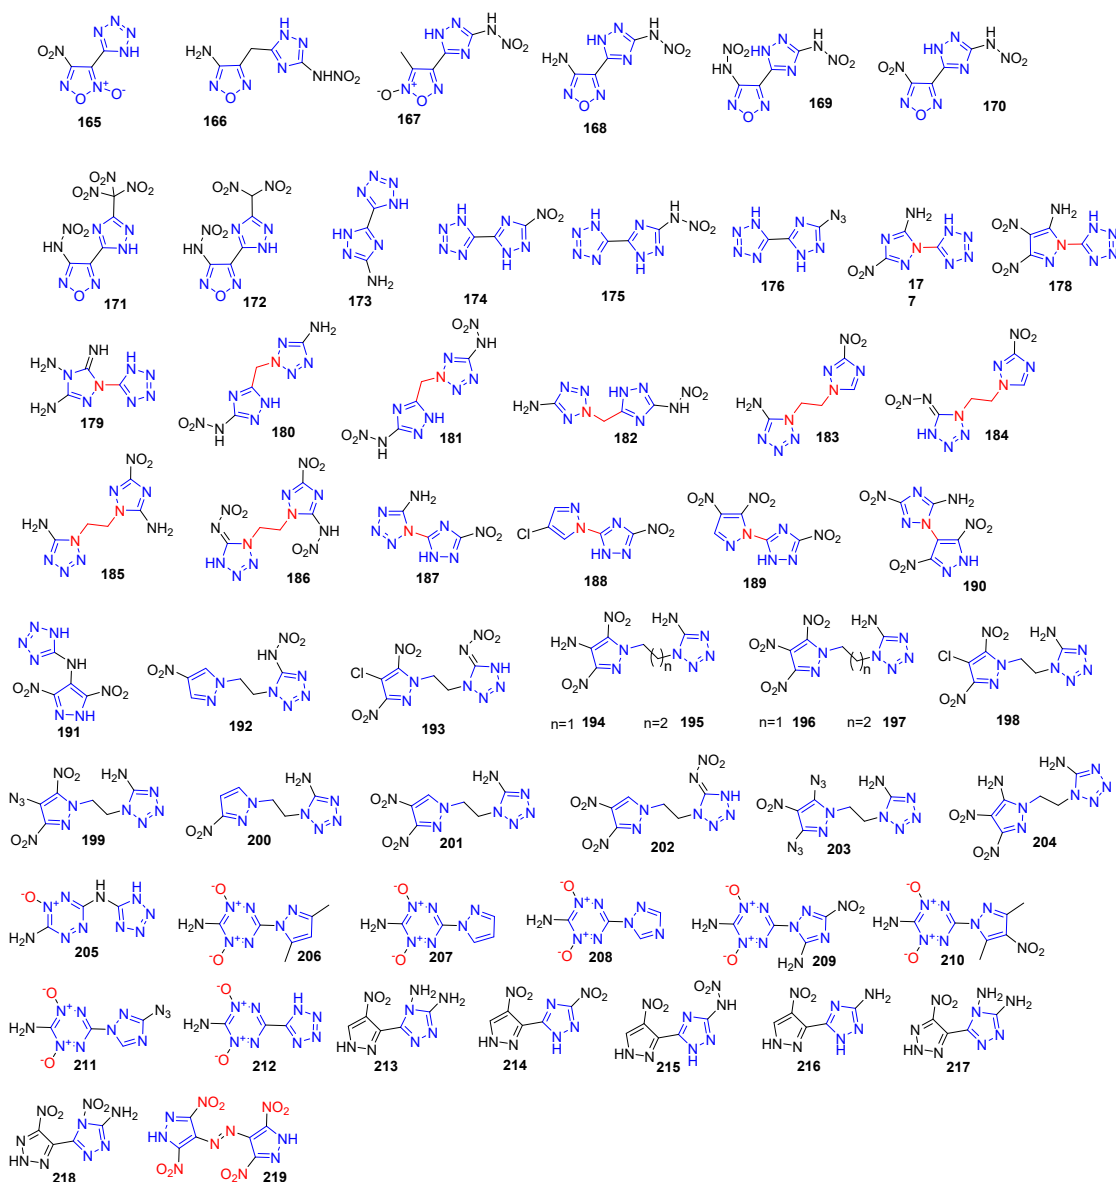

**Table S6.** Energetic properties of mixed heterocyclic-based energetic compound

| Compd      | T <sub>dec</sub> [°C] <sup>a</sup> | D [m s <sup>-1</sup> ] <sup>b</sup> | P [GPa] <sup>c</sup> | Δ <sub>r</sub> H [kJ mol <sup>-1</sup> ] <sup>d</sup> | IS [J] <sup>e</sup> | FS [N] <sup>f</sup> | d [g cm <sup>-3</sup> ] <sup>g</sup> |
|------------|------------------------------------|-------------------------------------|----------------------|-------------------------------------------------------|---------------------|---------------------|--------------------------------------|
| <b>165</b> | 169                                | 8681                                | 34.3                 | 500                                                   | <2                  | /                   | 1.81                                 |
| <b>166</b> | 197                                | 8079                                | 24.9                 | 449                                                   | >40                 | >360                | 1.70                                 |
| <b>167</b> | 181                                | 8236                                | 28.2                 | 444                                                   | >40                 | >360                | 1.74                                 |
| <b>168</b> | 196                                | 8332                                | 27.7                 | 468                                                   | 35                  | 360                 | 1.74                                 |
| <b>169</b> | 128                                | <b>9258</b>                         | 39.1                 | 549                                                   | <b>18</b>           | 250                 | 1.92                                 |
| <b>170</b> | 163                                | <b>9025</b>                         | 36.0                 | 525                                                   | <b>20</b>           | 280                 | 1.85                                 |
| <b>171</b> | 67                                 | <b>9278</b>                         | 39.0                 | 549                                                   | 4                   | 60                  | 1.89                                 |
| <b>172</b> | 91                                 | <b>9005</b>                         | 36.3                 | 537                                                   | 9                   | 100                 | 1.85                                 |
| <b>173</b> | 347                                | 7193                                | 18.7                 | 511                                                   | >40                 | >360                | 1.61                                 |
| <b>174</b> | 211                                | 8020                                | 26.5                 | 519                                                   | 25                  | 288                 | 1.73                                 |

---

|            |            |      |      |      |     |      |      |
|------------|------------|------|------|------|-----|------|------|
| <b>175</b> | 215        | 8097 | 26.6 | 577  | <1  | 18   | 1.71 |
| <b>176</b> | 164        | 7874 | 24.1 | 859  | <1  | 20   | 1.66 |
| <b>177</b> | 246        | 8316 | 28.8 | 487  | >40 | >360 | 1.77 |
| <b>178</b> | 324        | 8423 | 24.2 | 440  | >60 | /    | 1.69 |
| <b>179</b> | 239        | 7852 | 23.0 | 223  | >40 | >360 | 1.65 |
| <b>180</b> | 204        | 8187 | 24.9 | 476  | 15  | 240  | 1.71 |
| <b>181</b> | 159        | 8750 | 31.8 | 285  | 10  | 160  | 1.81 |
| <b>182</b> | 218        | 8213 | 25.2 | 462  | 18  | 360  | 1.72 |
| <b>183</b> | 255        | 7395 | 18.8 | 383  | >40 | >360 | 1.58 |
| <b>184</b> | 181        | 8113 | 25.6 | 477  | 38  | >360 | 1.69 |
| <b>185</b> | 277        | 7807 | 21.6 | 359  | >40 | >360 | 1.66 |
| <b>186</b> | 96         | 8690 | 32.2 | 512  | 12  | 240  | 1.80 |
| <b>187</b> | 200 (melt) | 6662 | 16.8 | 328  | >40 | >360 | 1.66 |
| <b>188</b> | 330        | 8262 | 29.0 | 140  | >40 | >360 | 1.75 |
| <b>189</b> | 270        | 9167 | 37.8 | 833  | 9   | 240  | 1.84 |
| <b>190</b> | 222        | 9261 | 38.3 | 848  | 25  | 168  | 1.85 |
| <b>191</b> | 279        | 9289 | 38.6 | 856  | 35  | 240  | 1.86 |
| <b>192</b> | 136        | 7824 | 23.1 | 463  | 39  | 360  | 1.65 |
| <b>193</b> | 130        | 7890 | 25.9 | 242  | 24  | 360  | 1.75 |
| <b>194</b> | 257        | 7889 | 23.2 | 334  | >40 | 360  | 1.67 |
| <b>195</b> | 265        | 7768 | 21.8 | 356  | >40 | 360  | 1.65 |
| <b>196</b> | 135        | 8172 | 27.1 | 431  | 30  | 240  | 1.71 |
| <b>197</b> | 134        | 7959 | 24.7 | 437  | >40 | 360  | 1.67 |
| <b>198</b> | 221        | 7448 | 21.7 | 393  | >40 | >360 | 1.71 |
| <b>199</b> | 159        | 8185 | 26.1 | 785  | 10  | 120  | 1.66 |
| <b>200</b> | 254        | 7072 | 16.8 | 356  | >40 | >360 | 1.53 |
| <b>201</b> | 232        | 7516 | 20.6 | 395  | >40 | >360 | 1.59 |
| <b>202</b> | 157        | 8114 | 26.7 | 486  | 34  | 240  | 1.69 |
| <b>203</b> | 127        | 7917 | 23.1 | 1058 | 3   | 80   | 1.63 |
| <b>204</b> | 239        | 7883 | 23.0 | 369  | >40 | >360 | 1.68 |
| <b>205</b> | 192        | 8429 | 27.3 | 352  | 35  | 360  | 1.76 |
| <b>206</b> | 252        | 8180 | 23.6 | 348  | 35  | 360  | 1.76 |
| <b>207</b> | 237        | 8304 | 26.4 | 427  | 27  | 360  | 1.79 |
| <b>208</b> | 221        | 8438 | 27.7 | 449  | 24  | 360  | 1.80 |

---

|            |     |      |      |       |     |      |      |
|------------|-----|------|------|-------|-----|------|------|
| <b>209</b> | 168 | 8707 | 32.0 | 431   | 17  | 240  | 1.84 |
| <b>210</b> | 211 | 8413 | 27.5 | 328   | 19  | 360  | 1.82 |
| <b>211</b> | 161 | 8731 | 30.9 | 781   | 8   | 60   | 1.82 |
| <b>212</b> | 181 | 8884 | 32.4 | 539   | 14  | 120  | 1.85 |
| <b>213</b> | 331 | 9075 | 30.7 | 475   | >80 | >360 | 1.87 |
| <b>214</b> | 278 | 8182 | 27.0 | 366   | 50  | 324  | 1.79 |
| <b>215</b> | 205 | 8336 | 27.8 | 390   | 20  | 240  | 1.80 |
| <b>216</b> | 281 | 8255 | 24.6 | 389   | >80 | >360 | 1.79 |
| <b>217</b> | 263 | 8194 | 25.2 | 663   | 18  | 200  | 1.70 |
| <b>218</b> | 221 | 8733 | 31.6 | 730   | 16  | 180  | 1.78 |
| <b>219</b> | 221 | 9083 | 36.6 | 699.8 | >40 | 240  | 1.85 |

[a] Decomposition temperature. [b] Detonation velocity. [c] Detonation pressure. [d] Calculated heat of formation. [e] Impact sensitivity. [f] Friction sensitivity [g] Density.



#### 4. Crystallographic datas

The crystal of **DNPAT** and **5** were performed on a Bruker Smart Apex II diffractometer with graphite-monochromated Mo K $\alpha$  radiation ( $\lambda = 0.71073 \text{ \AA}$ ), respectively. Integration and scaling of intensity data were accomplished using the SAINT program2. The structures were solved by intrinsic using SHELXT2014 and refinement was carried out by a full- matrix least-squares technique using SHELXT2014. The hydrogen atoms were refined isotropically, and the heavy atoms were refined anisotropically. N-H and O-H hydrogens were located from different electron density maps, and C-H hydrogens were placed in calculated positions and refined with a riding model. Data were corrected for the effects of absorption using SADABS4 Relevant crystal data and refinement results are summarized in Table S7.

**Table S7** Crystallographic datas for compounds **DNPAT** and **5**

| Compound                                  | <b>DNPAT</b>                                                  | <b>5</b>                                                                                                       |
|-------------------------------------------|---------------------------------------------------------------|----------------------------------------------------------------------------------------------------------------|
| Empirical formula                         | C <sub>10</sub> H <sub>4</sub> N <sub>16</sub> O <sub>8</sub> | C <sub>5</sub> H <sub>3</sub> N <sub>9</sub> O <sub>6</sub> 1.5(C <sub>4</sub> H <sub>8</sub> O <sub>2</sub> ) |
| Formula weight                            | 476.29                                                        | 417.32                                                                                                         |
| Temperature/K                             | 173                                                           | 173                                                                                                            |
| Crystal system                            | orthorhombic                                                  | triclinic                                                                                                      |
| Space group                               | Pbca                                                          | P-1                                                                                                            |
| a/Å                                       | 10.7356(16)                                                   | 8.7665(19)                                                                                                     |
| b/Å                                       | 10.1583(16)                                                   | 10.158(2)                                                                                                      |
| c/Å                                       | 15.310(2)                                                     | 10.814(2)                                                                                                      |
| $\alpha$ /°                               | 90                                                            | 114.184(3)                                                                                                     |
| $\beta$ /°                                | 90                                                            | 98.141(3)                                                                                                      |
| $\gamma$ /°                               | 90                                                            | 99.022(3)                                                                                                      |
| Volume/Å <sup>3</sup>                     | 1669.6(4)                                                     | 844.7(3)                                                                                                       |
| Z                                         | 4                                                             | 2                                                                                                              |
| $\rho$ (calc) mg/mm <sup>3</sup>          | 1.895                                                         | 1.641                                                                                                          |
| Absorption coefficient m/mm <sup>-1</sup> | 0.166                                                         | 0.143                                                                                                          |
| F(000)                                    | 960.0                                                         | 432                                                                                                            |
| Crystal size/mm <sup>3</sup>              | 0.19 × 0.12 × 0.08                                            | 0.05 × 0.11 × 0.23                                                                                             |
| 2 $\theta$ range for data collection      | 5.322 to 52.918                                               | 4.242 to 50.036°                                                                                               |
| Index ranges                              | -13 ≤ h ≤ 13, -12 ≤ k ≤ 12, -19 ≤ l ≤ 18                      | -10 ≤ h ≤ 10, -12 ≤ k ≤ 12, -12 ≤ l ≤ 12                                                                       |
| Reflections collected                     | 12929                                                         | 9753                                                                                                           |
| Independent reflections                   | 1726[R <sub>int</sub> = 0.0696, R <sub>sigma</sub> = 0.0408]  | 2948[R(int) = 0.0518]                                                                                          |
| Data/restraints/parameters                | 1726/176/180                                                  | 2948/3/271                                                                                                     |
| Goodness-of-fit on F <sup>2</sup>         | 1.062                                                         | 1.051                                                                                                          |
| Final R indexes [I ≥ 2 $\sigma$ (I)]      | 0.0560, 0.1508                                                | 0.0440, 0.0809                                                                                                 |
| Final R indexes [all data]                | 0.0753, 0.1650                                                | 0.0741, 0.0916                                                                                                 |

**Table S8** Hydrogen bonds for [ $\text{\AA}$  and  $^\circ$ ] compound **DNPAT**

| D—H $\cdots$ A                  | d(D-H)/ $\text{\AA}$ | d(H $\cdots$ A)/ $\text{\AA}$ | d(D $\cdots$ A)/ $\text{\AA}$ | $\angle$ (DHA)/ $^\circ$ |
|---------------------------------|----------------------|-------------------------------|-------------------------------|--------------------------|
| N4—H4 $\cdots$ N6 <sup>i</sup>  | 0.90(4)              | 1.94(4)                       | 2.803(3)                      | 161(3)                   |
| N5—H5 $\cdots$ O1               | 0.85(4)              | 2.34(3)                       | 2.819(3)                      | 116(3)                   |
| N5—H5 $\cdots$ N7 <sup>ii</sup> | 0.85(4)              | 2.21(4)                       | 2.961(3)                      | 148(3)                   |

Symmetry Code i: 3/2-x, -1/2+y, z ii: 3/2-x, 1/2+y, z

**Table S9** Hydrogen bonds for [ $\text{\AA}$  and  $^\circ$ ] compound **5**

| D—H $\cdots$ A                    | d(D-H)/ $\text{\AA}$ | d(H $\cdots$ A)/ $\text{\AA}$ | d(D $\cdots$ A)/ $\text{\AA}$ | $\angle$ (DHA)/ $^\circ$ |
|-----------------------------------|----------------------|-------------------------------|-------------------------------|--------------------------|
| N2-H2 $\cdots$ O2                 | 0.91(3)              | 2.23(3)                       | 2.650(3)                      | 107(2)                   |
| N2-H2 $\cdots$ O9                 | 0.91(3)              | 1.84(3)                       | 2.706(3)                      | 157(3)                   |
| N4-H4 $\cdots$ O7                 | 0.906(19)            | 1.796(19)                     | 2.701(3)                      | 178(3)                   |
| N6-H6 $\cdots$ O8 <sup>i</sup>    | 0.905(19)            | 1.920(19)                     | 2.784(3)                      | 159(2)                   |
| C7-H7A $\cdots$ O4 <sup>ii</sup>  | 0.9900               | 2.5800                        | 3.559(3)                      | 168.00                   |
| C8-H8A $\cdots$ O6 <sup>iii</sup> | 0.9900               | 2.5600                        | 3.491(3)                      | 157.00                   |

Symmetry Code: i: 2-x, 2-y, 1-z, ii: x, -1+y, z, iii: 1+x, y, 1+z

**5.  $^1\text{H}$  NMR and  $^{13}\text{C}$  NMR of target compounds**

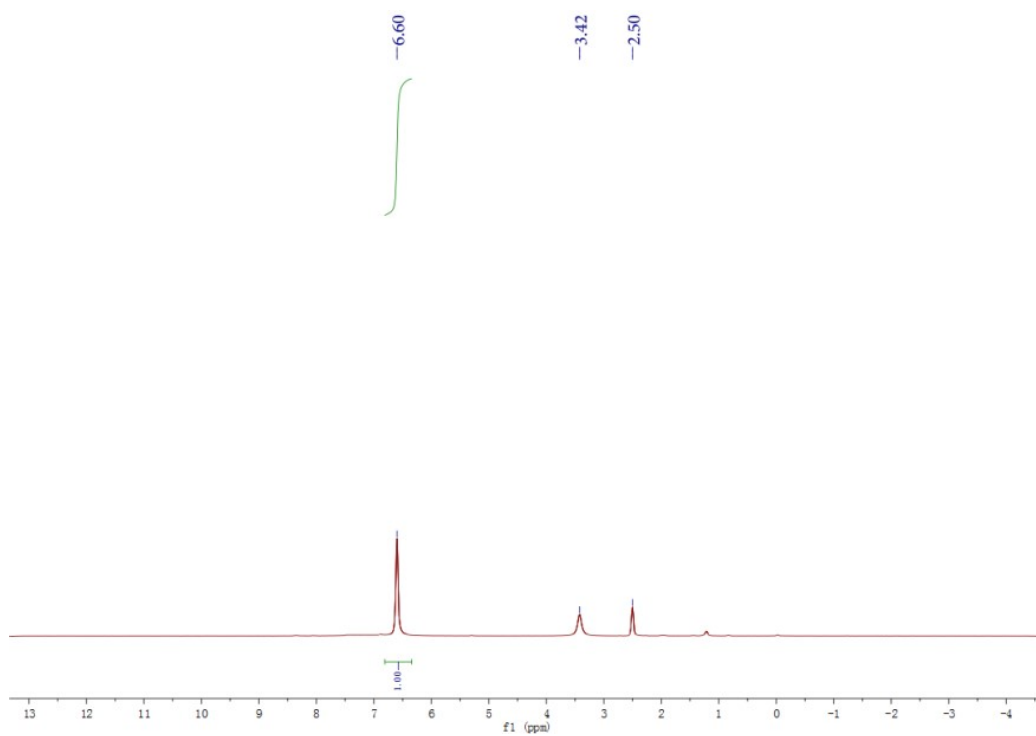

Figure S1.  $^1\text{H}$  NMR spectra in  $\text{DMSO-}d_6$  for compound 4

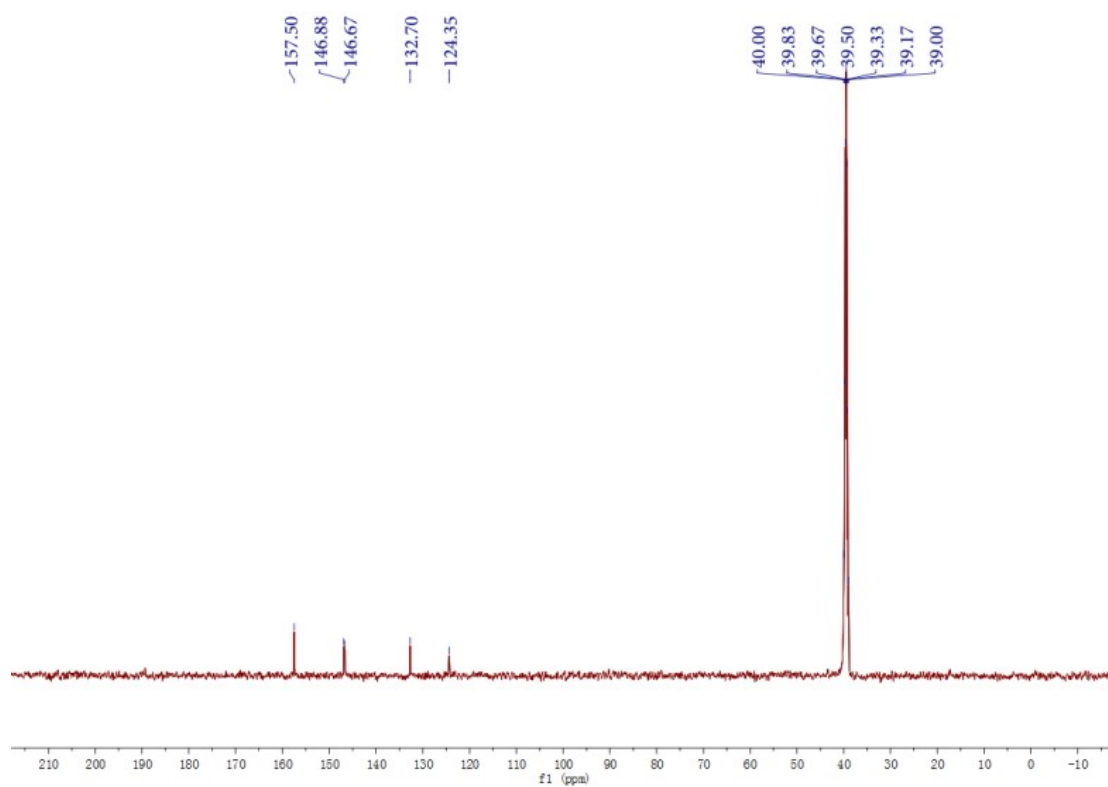

Figure S2.  $^{13}\text{C}$  NMR spectra in  $\text{DMSO-}d_6$  for compound 4

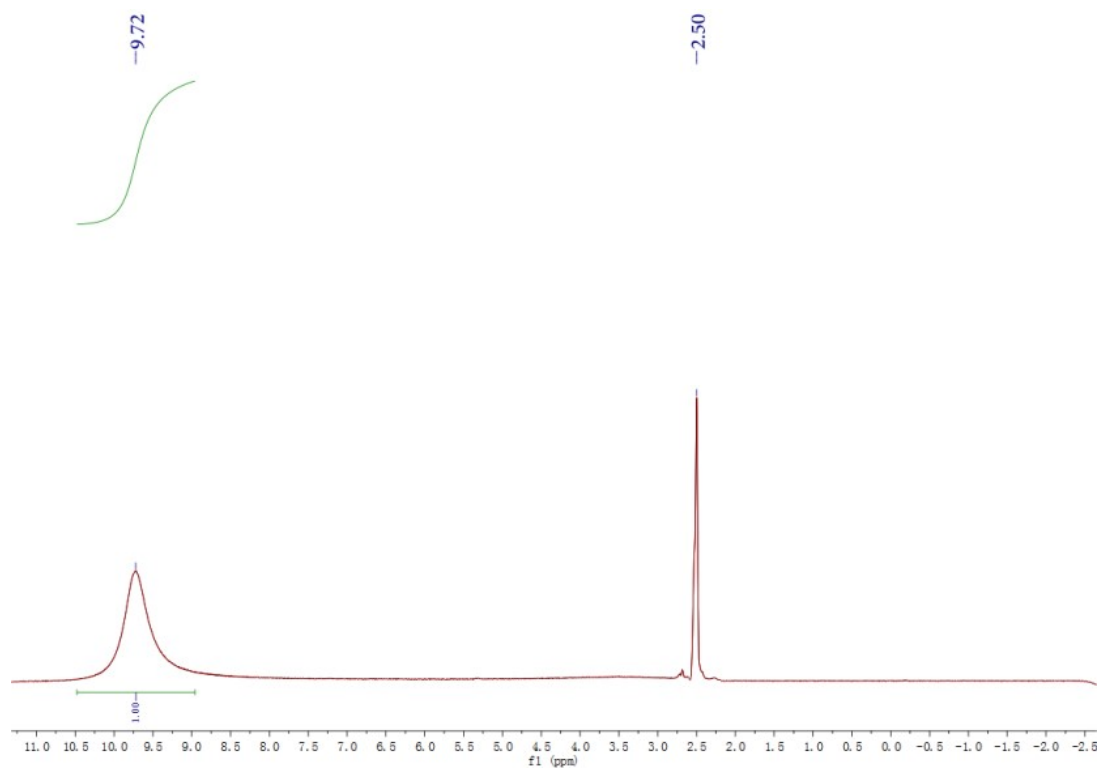

Figure S3.  $^1\text{H}$  NMR spectra in  $\text{DMSO-}d_6$  for compound DNPAT

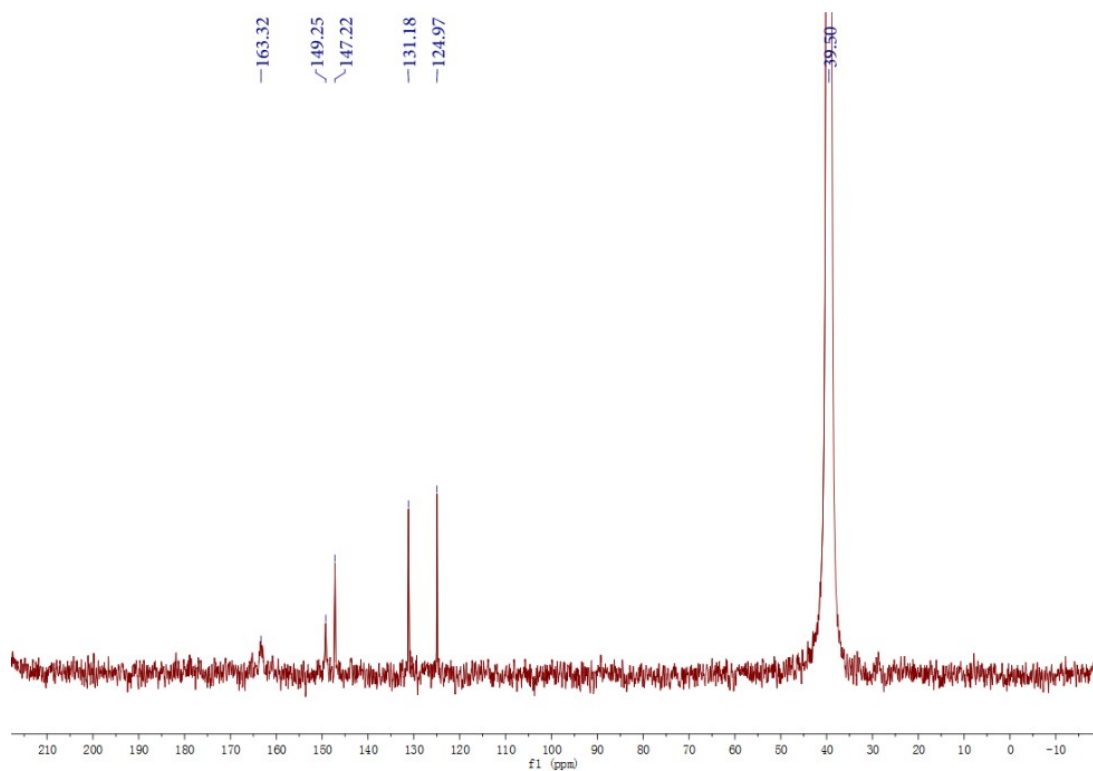

Figure S4.  $^{13}\text{C}$  NMR spectra in  $\text{DMSO-}d_6$  for compound DNPAT

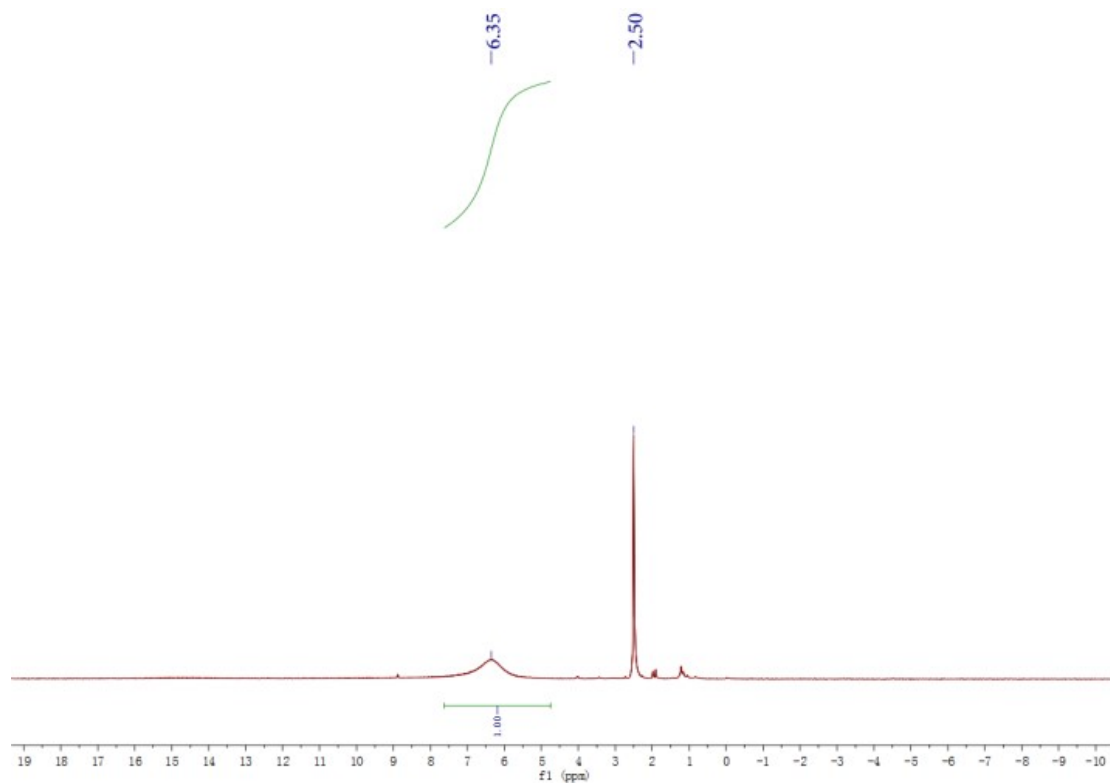

**Figure S5.**  $^1\text{H}$  NMR spectra in  $\text{DMSO-}d_6$  for compound **5**

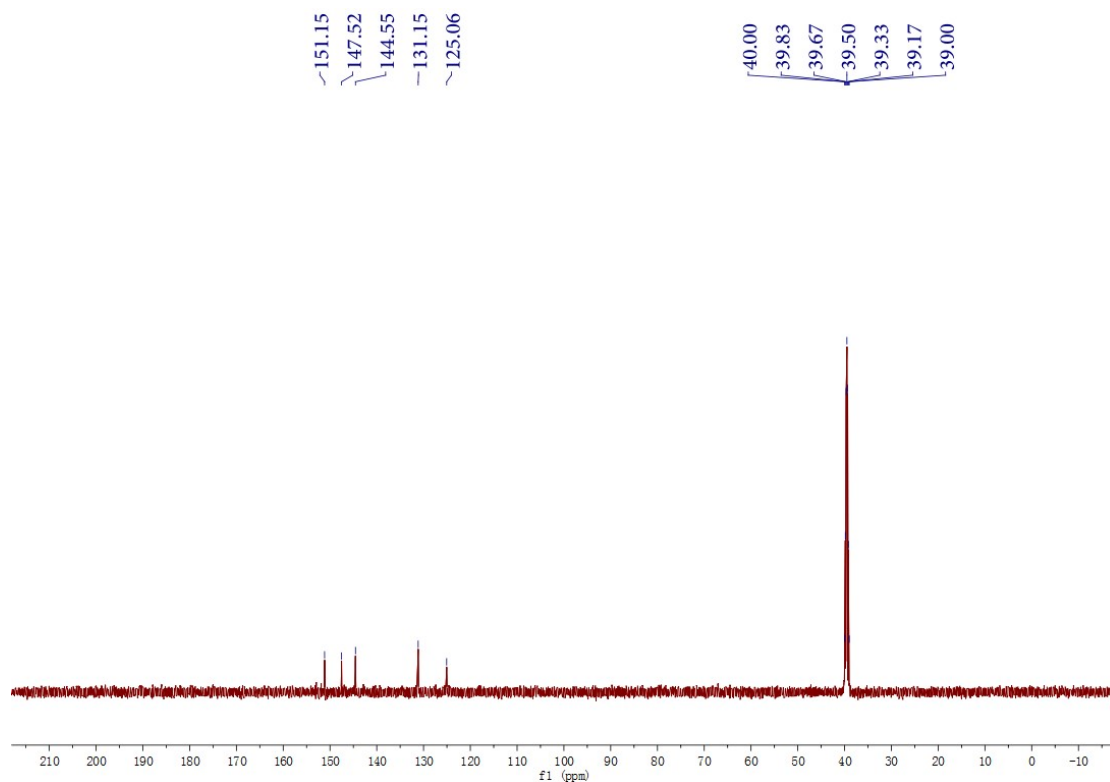

**Figure S6.**  $^{13}\text{C}$  NMR spectra in  $\text{DMSO-}d_6$  for compound **5**

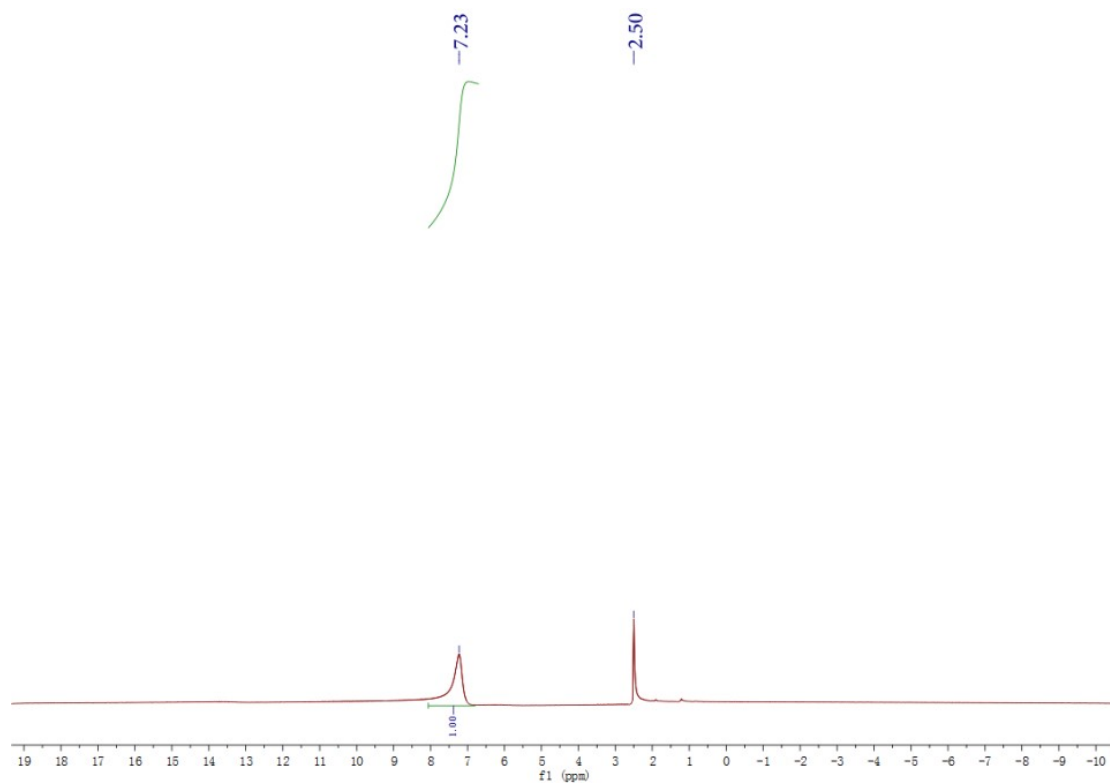

**Figure S7.** <sup>1</sup>H NMR spectra in DMSO-*d*<sub>6</sub> for compound 6

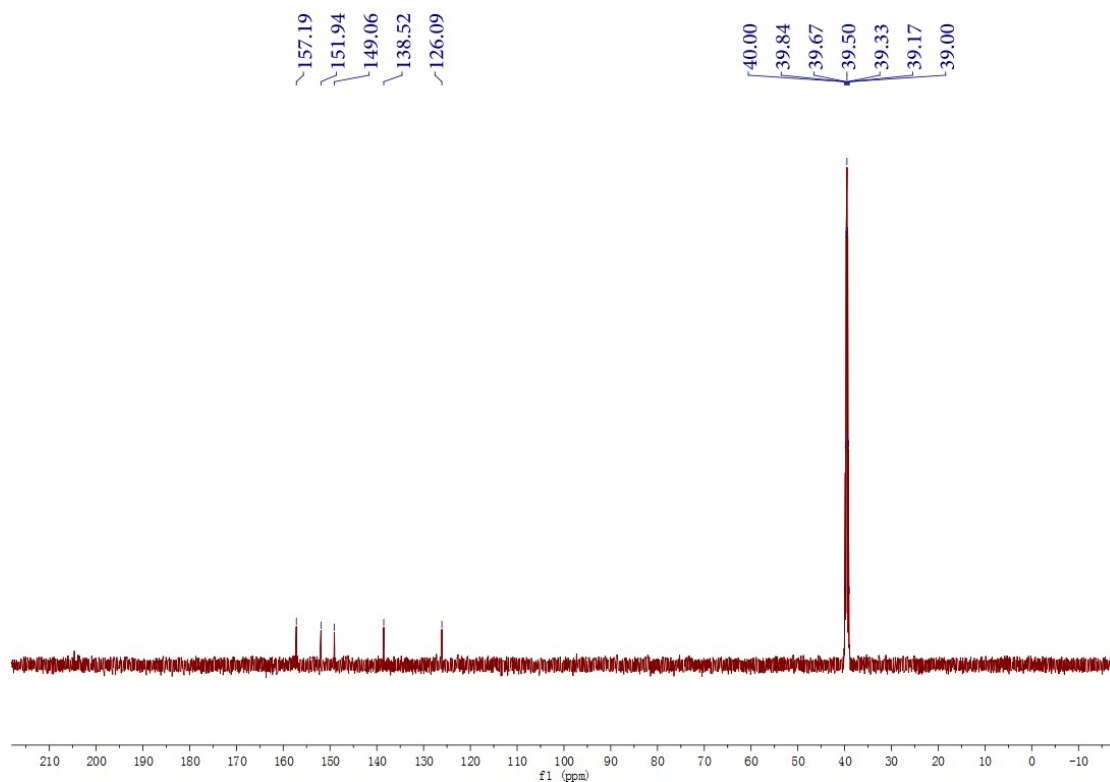

**Figure S8.** <sup>13</sup>C NMR spectra in DMSO-*d*<sub>6</sub> for compound 6

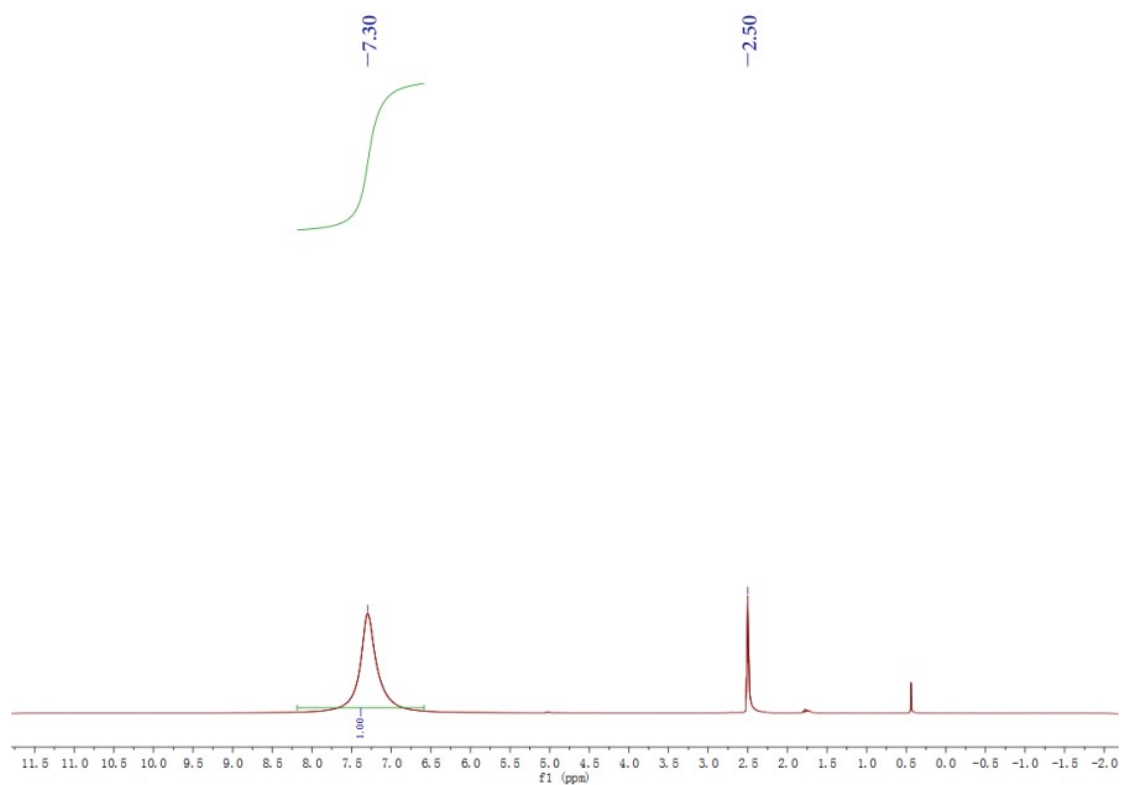

**Figure S9.**  $^1\text{H}$  NMR spectra in  $\text{DMSO-}d_6$  for compound 7

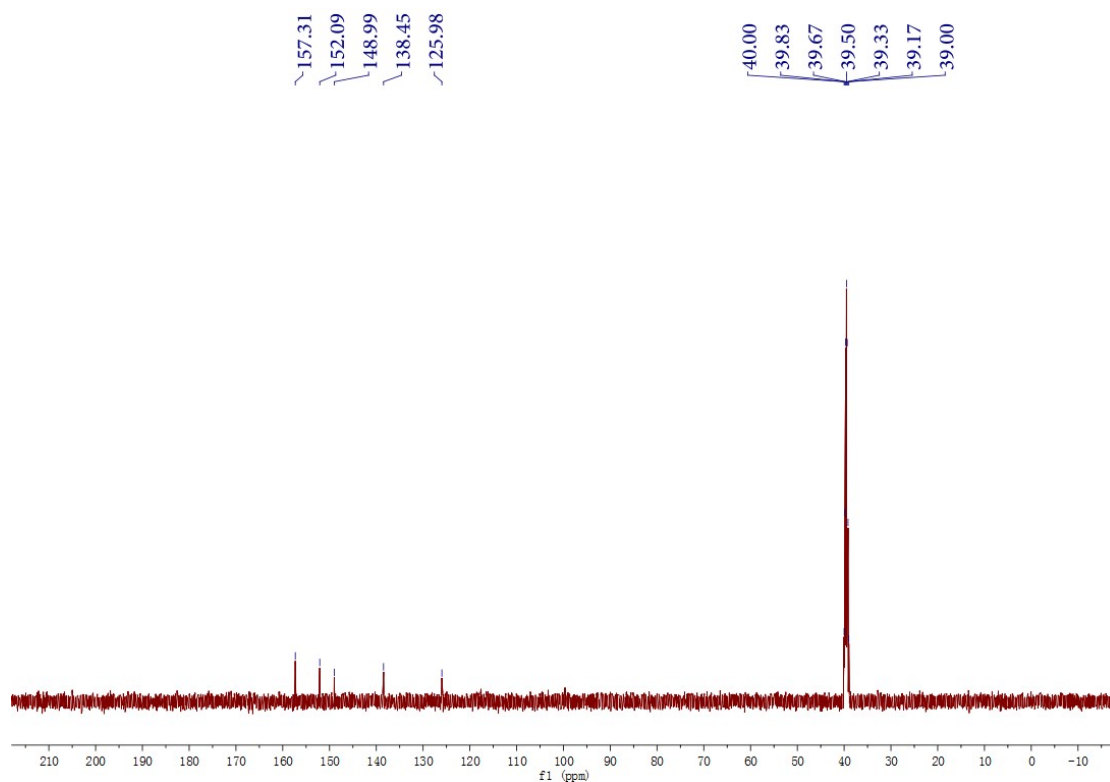

**Figure S10.**  $^{13}\text{C}$  NMR spectra in  $\text{DMSO-}d_6$  for compound 7

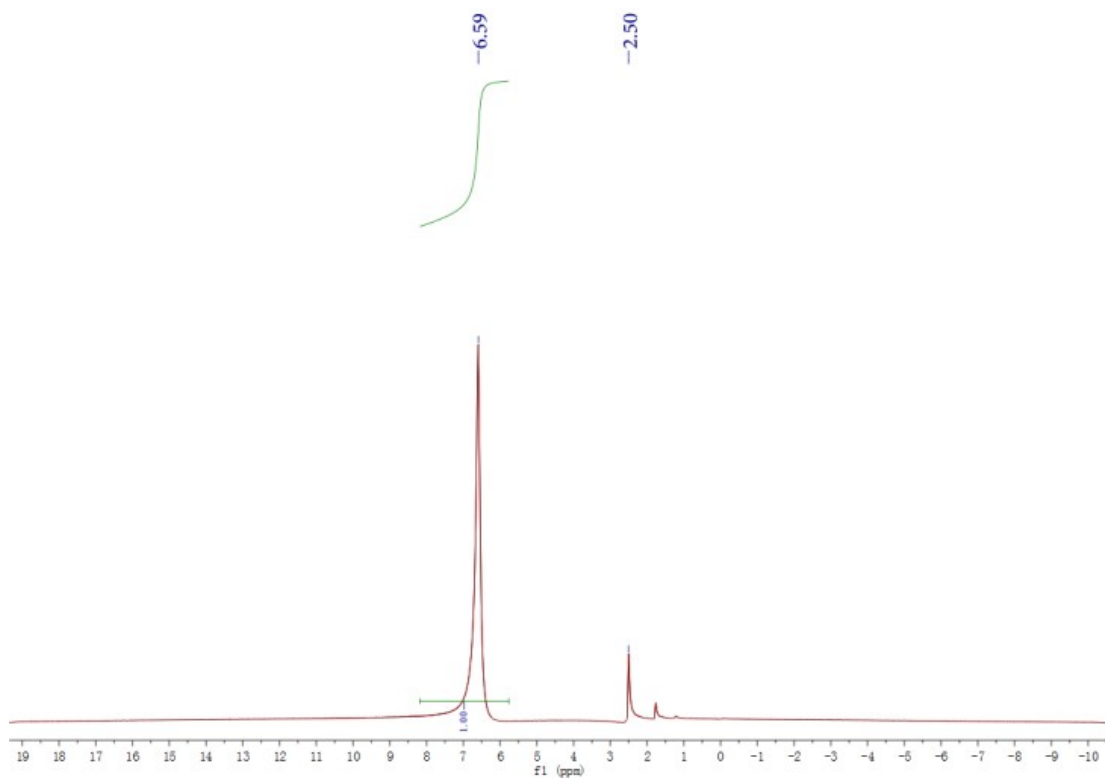

**Figure S11.**  $^1\text{H}$  NMR spectra in  $\text{DMSO-}d_6$  for compound **8**

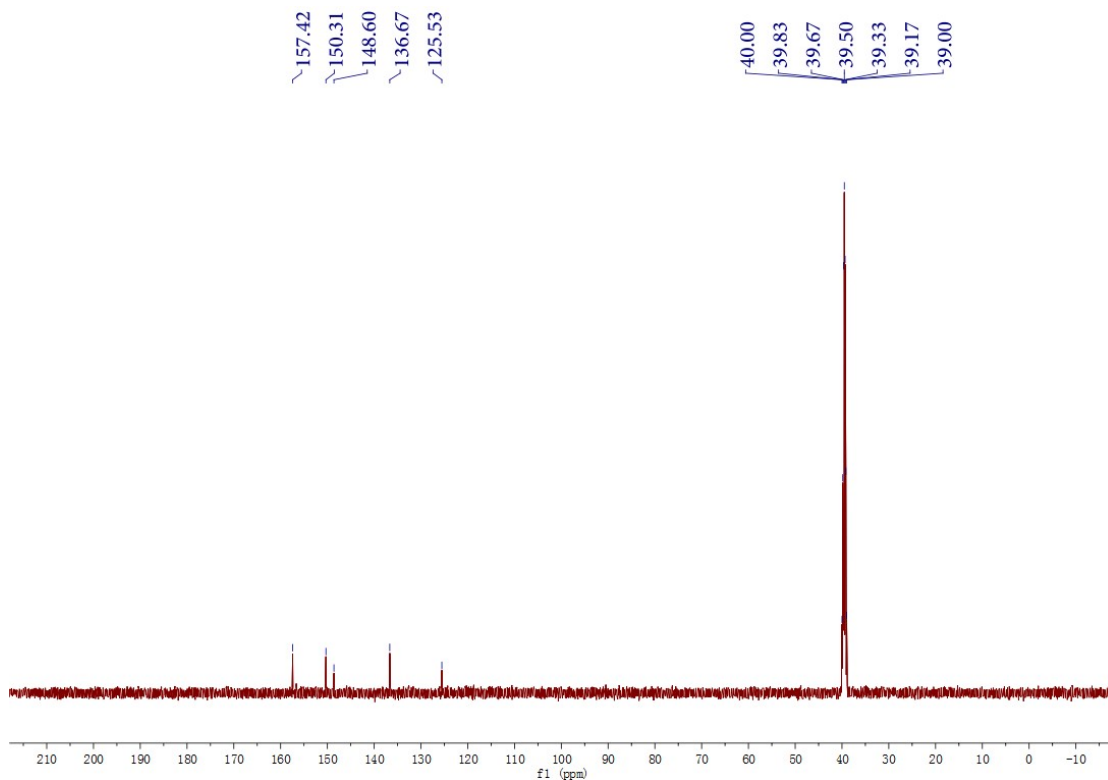

**Figure S12.**  $^{13}\text{C}$  NMR spectra in  $\text{DMSO-}d_6$  for compound **8**



## 6. The DSC plots of synthesized compounds

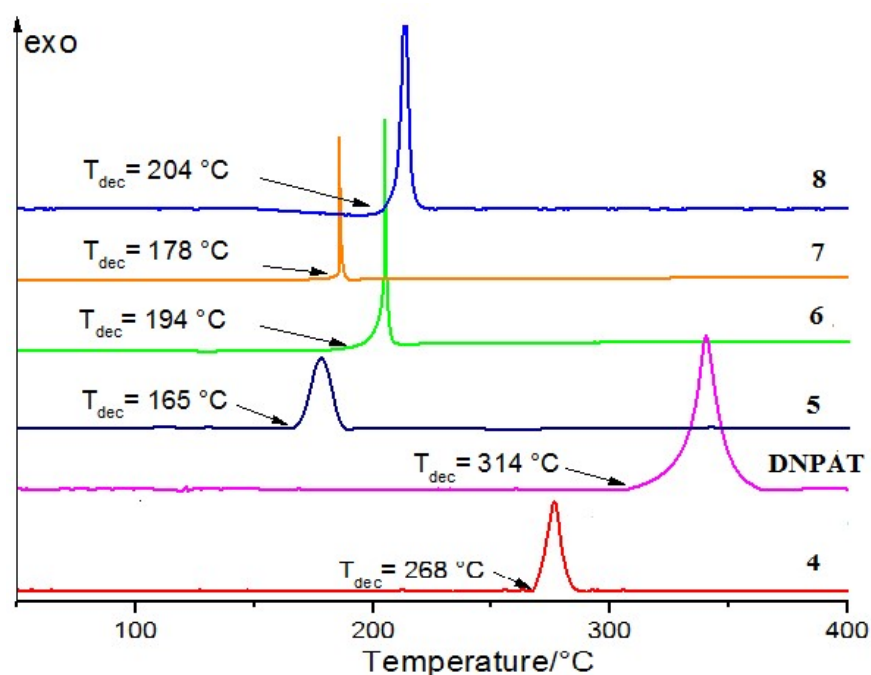

**Figure S13.** The DSC plots of compounds **DNPAT**, and **5-8**

## 7. 5s Bursting temperature experiments

**Table S11.** Results of 5s bursting temperature experiments.

| Number   | 1    | 2    | 3   | 4   | 5   | 6   | 7   | 8   | $T_{5s}/$<br>°C |
|----------|------|------|-----|-----|-----|-----|-----|-----|-----------------|
| T/°C     | 365  | 370  | 375 | 380 | 385 | 390 | 395 | 400 | > 400           |
| $\tau/s$ | 11.0 | 10.2 | 9.4 | 8.8 | 8.2 | 7.5 | 7.0 | 6.5 |                 |

## 8. Reference

- [1] Frisch, M. J.; Trucks, G. W.; Schlegel, H. B.; Daniels, A. D.; Farkas, O.; Foresman, J. B.; Ortiz, J. V.; Cioslowski, J.; Fox, D. J. Gaussian 09, Revision D. 01, Gaussian, Inc. Wallingford CT, **2009**.
- [2] P. C. Hariharan, J. A. Pople, *Theor. Chim. Acta.* **1973**, 28, 213-222.
- [3] Ochterski, J. W.; Petersson, G. A.; Montgomery, J. A. A complete basis set model chemistry. V. Extensions to six or more heavy atoms. *J. Chem. Phys.* **1996**, 104 (7), 2598-2619.
- [4] Jenkins, H. D. B.; Tudeal, D.; Glasser, L. Lattice Potential Energy Estimation for Complex Ionic Salts from Density Measurements. *Inorg. Chem.*, **2002**, 41 (9), 2364-2367.
